# Supplementary material
Source: HighWire-hosted journal article supplement (https://jitc.bmj.com/content/8/1/e000475)
Supplement: inline-supplementary-material-1 [file inline-supplementary-material-1.xlsx]

## Sheet: Sheet1
nct_id	start_date	enrollment	Trial	NCT	phase	randomized? ** (1 yes 0 no)	biomarker		Adaptive features? (2 declared AND visibe, 1 declared only, 0 no)	Specific adaptive features	selection/assignation conditioned by biomarker (0 no, 1 yes)	Stratification conditioned by biomarker	exploratory (1), stratified (2), selective (3), NA (0) Stefi	includes chemo? yes (1), no (0)	Endpoints/outcome assessed (1: response RECIST; 2: PFS/OS; 3: safety/MTD; 4: other) Primary outcome in bold	If other (4), specify	Primary endpoint(s)	Secondary endpoint(s)	Assessment with iRECIST (1 declared; 0 no/not declared)	biomarkers assessed	naive/post IT (0 not allowed; 1 allowed; 2 required)	drugs	drugs combo	disease(s)	setting (1 met; 2 adj; 3 neoadj)	Reference	Reference (link)
							1 yes, 0 no	pre/post (1 pre 2 post 3 both)
NCT03822351	2018	300	ADVISE	NCT03335540	1	0	1	3	1		1	0	1	0	4; 3	change in biomarker expression; change in histopathological features	Change in biomarker expression Change in histopathological features	Safety/MTD	0	CD8, PDL1, LAG3, IDO, CSF1R, FOXp3, GITR, NKp46	1	1: Nivolumab 2: Relatlimab (anti-LAG3) 3: Cabiralizumab (anti-CSF1) 4: Ipilimumab 5: BMS-986156 (anti-GITR) 6: BMS-986205 (IDO1 inhib) 7: Lirilumab (anti-KIR) 8: Radiation Therapy	1+2 1+3 1+4 1+5 1+6 1+7 1+8	advanced cancers	1	Luke JJ, J Clin Oncol 2018 (TPS3101)	https://ascopubs.org/doi/abs/10.1200/JCO.2018.36.15_suppl.TPS3101
NCT03381274	2018	98	AMBITION	NCT03699449	2	1	1	1	1		1	0	3	0	1; 2		Response rate	PFS/OS	1	HRD	0	1: olaparib 2: cediranib (VEGF-inhib) 3: durvalumab 4: tremelimumab 5: chemotherapy	1+2 1+3 3+5 3+4+5	Platinum-resistant Recurrent Ovarian Cancer	1	Lee JY, AACR 2018 #A003	https://www.aacr.org/Documents/AACRKCA18_Poster_A.pdf
NCT02723955	2016	500	BISCAY	NCT02546661	1	1	1	1	1	considers future cohorts, each cohort has fixed size (20)	1	0	3	0	3; 1; 2; 4	PK, immunogenicity	Safety/MTD	Response rate PFS/OS PK, immunogenicity	1	FGFR, HRD, cell cycle genes (MYC, Rb, CDKN2A, CCNE1), RICTOR amplification, or TSC1/1	1	1: AZD4547 (anti-FGFR) 2: MEDI4736 (durvalumab) 3: Olaparib 4: AZD1775 (WEE1-inhib) 5: Vistusertib (mTOR inhib) 6: AZD9150 (STAT3-inhib) 7: Selumetinib (MEK-inhib)	1 vs 1+2 1 vs 1+3 1 vs 1+4 1 vs 1+5 1 vs 1+6 1 vs 1+7	muscle invasive bladder cancer (MIBC)	1	Powles T, J Clin Oncol 2017 (TPS4577)	https://ascopubs.org/doi/abs/10.1200/JCO.2016.34.15_suppl.TPS4577
NCT03923270	2019	54	CheckMate142	NCT02060188	2	0	1	1	2	Simon's 2-stage	1	0	3	0	1		Response rate	NA	0	MSI	0	1: Ipilimumab 2: Nivolumab 3: Cobimetinib (MEK) 4: Daratumumab (anti-CD38) 5: anti-LAG-3 antibody	2 1+2 1+2+3 2+5 2+4	CRC	1	Overman MJ, Lancet oncol 2017	https://www.ncbi.nlm.nih.gov/pubmed/28734759
NCT03884556	2019	100	COAST	NCT03822351	2	1	NA	NA	0		NA	NA	0	1	1; 2; 3; 4	PK, immunogenicity	Response rate	Safety/MTD PFS/OS PK, immunogenicity	0	NA	0	1: durvalumab 2: oleclumab (CD73-inhib) 3: monalizumab	1 1+2 1+3	NSCLC	1	NCT	https://clinicaltrials.gov/ct2/show/NCT03822351
NCT03869190	2019	305	DAPPER	NCT03851614	2	1	1	1	0		NA	NA		0	4; 1; 2; 3	Changes in genomic and immune biomarkers	Changes in genomic and immune biomarkers	Response rate Safety/MTD PFS/OS	1	CD4, CD8, MSI	1	1: Durvalumab 2: Olaparib 3: Cediranib (VEGF-inhib)	1+2 1+3	MMRp-CRC, Pancreatic adk, Leiomyosarcoma	1	NCT	https://clinicaltrials.gov/ct2/show/NCT03851614
NCT03851614	2019	90	ECLIPSE	NCT03395899	2	1	1	3	1		0	NA	1	0	4; 3	2-fold Increase in GzmB+ CD8+ T cell levels	Changes in genomic and immune biomarkers	Safety/MTD	0	Immunephenotyping, CD8, PD-L1, MHC-I, caspase3, Ki67	0	1: Atezolizumab 2: Cobimetinib (MEK) 3: Ipatasertib (AKT-inhib) 4: Bevacizumab	1 1+2 1+3 1+3+4	HR+ BC	3	NCT	https://clinicaltrials.gov/ct2/show/NCT03395899
NCT03846310	2019	128	ESMART	NCT02813135	1/2	0	1	1	0		1	0	3	0	1; 2		Response rate PFS/OS	NA	0	advanced molecular profiling (i.e. WES/WGS +/- RNAseq) **rule for allocation/ enrollment not reported	NR	1: Ribociclib 2: Topotecan 3: Temozolomide 4: Everolimus 5: AZD1775 (WEE1-inhib) 6: Carboplatin 7: Olaparib 8: Irinotecan 9: Nivolumab 10: Enasidenib (IDH2-inhib) 11: Lirilumab (anti-KIR)	1+2+3 1+4 5+6 7+8 10 9+11	advanced cancers and hematologic malignancies	1	NCT	https://clinicaltrials.gov/ct2/show/NCT02813135
NCT03841110	2019	64	FRACTION RCC	NCT02996110	2	1	1	3	2	Simon's 2-stage	0	0	1	1	1; 2; 3		Response rate PFS/OS	Safety/MTD	0	phenotype and functional/activation status of immune cells, T-receptor sequencing, proteomic assessment of circulant cytokines, chemokines, tissue immune biomarkers; ctDNA;	1	1: Nivolumab 2: Ipilimumab 3: Relatlimab (anti-LAG3) 4: BMS-986205 (IDO1) 5: BMS-813160 (CCR2/CCR5 antagonist)	1+2 1+3 1+4 1+5	RCC	1	Simonsen KL, Eur J Cancer 2018	https://www.ncbi.nlm.nih.gov/pubmed/30292142
NCT03829436	2019	338	FRACTION lung	NCT02750514	2	1	1	3	2	Nested Simon-Fleming 4-stage, Simon 2-stage and single-stage	0	1	1	0	1; 2; 3		Response rate PFS/OS	Safety/MTD	0	phenotype and functional/activation status of immune cells, T-receptor sequencing, proteomic assessment of circulant cytokines, chemokines, tissue immune biomarkers; ctDNA;	1	1: Nivolumab 2: Dasatinib 3: Relatlimab (anti-LAG3) 4: Ipilimumab 5: BMS-986205 (IDO1)	1 1+2 1+3 1+4 1+5	NSCLC	1	Simonsen KL, Eur J Cancer 2019	https://www.ncbi.nlm.nih.gov/pubmed/30292142
NCT03819465	2018	200	FRACTION gastric	NCT02935634	2	1	1	3	2	Simon's 2-stage	0	1	1	1	1; 2; 3		Response rate PFS/OS	Safety/MTD	0	phenotype and functional/activation status of immune cells, T-receptor sequencing, proteomic assessment of circulant cytokines, chemokines, tissue immune biomarkers; ctDNA; H pylori	1	1: Nivolumab 2: Ipilimumab 3: Relatlimab (anti-LAG3) 4: BMS-986205 (IDO1)	1+2 1+3 1+4	GC	1	Simonsen KL, Eur J Cancer 2019	https://www.ncbi.nlm.nih.gov/pubmed/30292142
NCT03816358	2019	64	HUDSON	NCT03334617	2	0	1	1	1		1	0	2	0	1; 2; 3		Response rate	Safety/MTD PFS/OS	0	2 groups: biomarker matched and not matched matched: HRR, LKB1 aberration, ATM deficiency, RICTOR amplification	2	1: Durvalumab 2: AZD9150 (STAT3-inhib) 3: AZD6738 (ATR-inhib) 4: Vistusertib (mTOR inhib) 5: Olaparib 6: Oleclumab (CD73-inhib)	1+2 1+3 1+4 1+5 1+6	NSCLC	1	Heymach J, J Clin Oncol 2018 (TPS3120)	https://ascopubs.org/doi/abs/10.1200/JCO.2018.36.15_suppl.TPS3120
NCT03794544	2019	160	ICONIC	NCT02904226	1/2	0	1	3	NA		0	0	1	1	1; 2; 3; 4	PK	Response rate PFS/OS Safety/MTD	PK	0	peripheral blood CD4 ICOS hi T cell subsets; change in # of peripheral T eff or Tregs	1	1: JTX-2011 (anti-ICOS agonist) 2: nivolumab 3: ipilimumab 4: pembrolizumab	1 1+2 1+3 1+4	advanced cancers	1	Yap TA, J Clin Oncol 2018 (3000)	https://ascopubs.org/doi/abs/10.1200/JCO.2018.36.15_suppl.3000
NCT03784014	2019	960	JAVELIN Medley	NCT02554812	2	1	1	0	NA		0	0	1	1	1; 3		Response rate	Safety/MTD	0	Tumor tissue biomarkers, including, but not limited to, PD-L1 expression and tumor infiltrating CD8+ T lymphocytes	1	1: Avelumab 2: Utomilumab (anti-4-1BB) 3: PF-04518600 (OX40-agonist) 4: PD 0360324 (anti-CSF1)	1+2 1+3 1+4 1+2+3	advanced cancers	1	J Clin Oncol 2017 (TPS3106)	https://ascopubs.org/doi/abs/10.1200/JCO.2016.34.15_suppl.TPS3106
NCT03769155	2018	36	KEYNOTE-365	NCT02861573	1	0	0	0	0		0	0	1	0	1; 2; 3; 4	Decrease of ≥50% in Prostatic Specific Antigen	Response rate PFS/OS	Safety/MTD Decrease of ≥50% in Prostatic Specific Antigen	0	NR	0	1: Pembrolizumab 2: Olaparib 3: Docetaxel 4: Prednisone 5: Enzalutamide 6: Abiraterone acetate	1+2 1+3+4 1+5 1+6+4	mCRPC	1	Yu EY, J Clin Oncol 2019 (145)	https://ascopubs.org/doi/abs/10.1200/JCO.2019.37.7_suppl.145
NCT03742349	2019	220	KEYNOTE-495	NCT03516981	2	1	1	1	2	prespecified futility criteria and stoppage ruules	1	1	1	0	1		Response rate	NA	0	gene expression profile [GEP] tumor mutational burden [TMB]	0	1: Pembrolizumab 2: MK-4280 (anti-LAG3) 3: Lenvatinib (VEGFR-inhib) 4: MK-1308 (CTLA4-inhib)	1+2 1+3 1+4	NSCLC	1	Gutierrez M, J Clin Oncol 2019 (TPS9117)	https://ascopubs.org/doi/abs/10.1200/JCO.2019.37.15_suppl.TPS9117
NCT03742102	2018	100	MAGELLAN	NCT03819465	1	1	1	1	0		0	0	1	0	1; 2; 3		Response rate PFS/OS	Safety/MTD	0	PD-L1 **stratification	0	1: Durvalumab 2: Danvatirsen (STAT3-inhib) 3: Oleclumab (CD73-inhib) 4: CT of choice	1 1+2 1+3 1+4 1+2+4 1+3+4	NSCLC	1	NCT	https://clinicaltrials.gov/ct2/show/NCT03819465
NCT03707457	2019	30	MORPHEUS-mUC	NCT03869190	1/2	1	0	0	2	intra-study crossover allowed	0	0	1	0	1		Response rate	NA	0	NR	0	1: atezolizumab 2: enfortumab Vedotin (anti-nectin4) 3: niraparib 4: hu5F9-G4 (anti-CD47) 5: isatuximab (anti-CD38) 6: linagliptin 7: tocilizumab (anti-IL6)	1 1+2 1+3 1+4 1+5 1+6 1+7	platinum- pretreated urothelial carcinoma	1	Chau I, Annals of Oncol 2018 (mdy288)	Annals of Oncology (2018) 29 (suppl_8): viii400-viii441. 10.1093/annonc/mdy288
NCT03699449	2018	68	MORPHEUS-GC	NCT03281369	1/2	1	1	1	2	intra-study crossover allowed	1	0	1	0	1; 2; 3		Response rate PFS/OS	Safety/MTD	0	HER2 **in one cohort	0 (NR)	1: 5-Fluorouracil (5-FU) 2: Leucovorin 3: Oxaliplatin 4: Atezolizumab 5: Cobimetinib 6: Ramucirumab 7: Paclitaxel 8: PEGylated recombinant human hyaluronidase (PEGPH20) 9: BL-8040 (anti-CXCR4) 10: Linagliptin	(1+2+3) (1+2+3)+4+5 (1+2+3)+4 > 4+5 (1+2+3)+4 6+7 4+5 4+8 4+9 4+10	G/GEJ		Chau I, Annals of Oncol 2018 (mdy288)	Annals of Oncology (2018) 29 (suppl_8): viii400-viii441. 10.1093/annonc/mdy288
NCT03690986	2018	36	MORPHEUS-PC	NCT03193190	1/2	1	0	0	2	intra-study crossover allowed	0	0	1	0	1; 2; 3		Response rate PFS/OS	Safety/MTD	0	NA	0	1: Nab-Paclitaxel 2: Gemcitabine 3: Oxaliplatin 4: Leucovorin 5: Fluorouracil 6: Atezolizumab 7: Cobimetinib 8: PEGPH20 9: BL-8040 (anti-CXCR4) 10: Selicrelumab (anti-CD40) 11: Bevacizumab 12: Emactuzumab (anti-CSF1) 13: RO6874281 (FAP-IL2v)	1+2 3+4+5 1+2+6+10 1+2+6+10+11 1+2+6+11 1+2+6+12 6+7 6+8 6+9 6+12 6+13	pancreatic cancer	1	Chau I, Annals of Oncol 2018 (mdy288)	Annals of Oncology (2018) 29 (suppl_8): viii400-viii441. 10.1093/annonc/mdy288
NCT03575793	2018	55	MORPHEUS-NSCLC	NCT03337698	1/2	1	0	0	2	intra-study crossover allowed	0	0	1	0	1; 2;		Response rate	PFS/OS	0	NA	2	1: Atezolizumab 2: Cobimetinib 3: RO6958688 (anti-CD3) 4: Docetaxel 5: BL-8040 (anti-CXCR4) 6: Tazemetostat (EZH2-inhib) 7: CPI-444 (anti-A2AR) 8: Pemetrexed 9: Carboplatin 10: Gemcitabine 11: Linagliptin 12: Tocilizumab (anti-IL6)	1 1+2 1+3+12 4 1+5 1+6 1+7 1+8+9 1+9+10 1+4 1+11	NSCLC	1	Chau I, Annals of Oncol 2018 (mdy288)	Annals of Oncology (2018) 29 (suppl_8): viii400-viii441. 10.1093/annonc/mdy288
NCT03549000	2018	344	MORPHEUS-CRC	NCT03555149	1/2	1	1	1	2	intra-study crossover allowed	1	0	1	0	1; 2; 3		Response rate Safety/MTD	PFS/OS	0	PD-L1 TPS>50% (for cohort 1 = first line)	1 **in cohort 2 = pretreated	1: Regorafenib 2: Atezolizumab 3: Imprime PGG 4: Bevacizumab 4: Isatuximab 5: Selicrelumab (anti-CD40)	1 2+3+4 2+4 2+4+5	NSCLC	1	Chau I, Annals of Oncol 2018 (mdy288)	Annals of Oncology (2018) 29 (suppl_8): viii400-viii441. 10.1093/annonc/mdy288
NCT03518606	2018	150	MORPHEUS-HR+BC	NCT03280563	1/2	1	0	0	2	intra-study crossover allowed	0	0	1	0	1; 2; 3		Response rate	Safety/MTD PFS/OS	0	NA	0	1: Atezolizumab 2: Bevacizumab 3: Enitinostat 4: Exemestane 5: Fulvestrant 6: Ipatasertib (AKT-inhib) 7: Tamoxifen	5 1+3 1+5 1+6 1+5+6 1+2+(4/5/7)	luminal- like BC (ER+/HER2-)	1	Chau I, Annals of Oncol 2018 (mdy288)	Annals of Oncology (2018) 29 (suppl_8): viii400-viii441. 10.1093/annonc/mdy288
NCT03511222	2018	56	MORPHEUS-TNBC	NCT03424005	1/2	1	1	1	2	intra-study crossover allowed	0	0	1	0	1; 2; 3		Response rate	Safety/MTD PFS/OS	0	PD-L1	0	1: Capecitabine 2: Atezolizumab 3: Ipatasertib (AKT-inhib) 4: SGN-LIV1A 5: Bevacizumab 6: Cobimetinib 7: CT (Gemcitabine + Carboplatin or Eribulin) 8: RO6874281 (FAP-IL2v) 9: Selicrelumab (anti-CD40)	1 2+3 2+4 2+5 2+5+6 2+1 2+7 2+8 2+9+5	TNBC	1	Chau I, Annals of Oncol 2018 (mdy288)	Annals of Oncology (2018) 29 (suppl_8): viii400-viii441. 10.1093/annonc/mdy288
NCT03459222	2018	230	NeoCOAST	NCT03794544	2	1	0	0	1		0	0	1	1	1; 3		Response rate	Safety/MTD	0	NA	0	1: Durvalumab 2: Oleclumab 3: Monalizumab 4: Danvatirsen (STAT3-inhib)	1 1+2 1+3 1+4	NSCLC	3	NCT	https://clinicaltrials.gov/ct2/show/NCT03794544
NCT03454451	2018	378	PIVOT-02	NCT02983045	1/2	0	1	1	2	Fleming 2 stage	1	1	3	1	1; 2; 3		Response rate Safety/MTD	PFS/OS	0	PD-L1 (NSCLC cohort) PD-L1 (breast) TILs CD8+ (CRC MSS)	1	1: NKTR-214 (CD122-agonist) 2: nivolumab 3: ipilimumab	1+2 1+2+3	RCC, NSCLC, urothelial Ca, TNBC, melanoma	1	Diab A, J Clin Oncol 2018 (3006)	https://ascopubs.org/doi/abs/10.1200/JCO.2018.36.15_suppl.3006
NCT03447314	2018	162	PLATforM	NCT03484923	2	1	0	1	2	prespecified futility criteria and stoppage ruules	0	1	2	0	1; 2		Response rate	PFS/OS	0	LDH	2	1:Spartalizumab 2: LAG525 3: Capmatinib 4: Canakinumab 5: Ribociclib	1+2 1+3 1+4 1+5	melanoma	1	Weber J, Ann Oncol 2018 (1304TiP)	https://academic.oup.com/annonc/article/29/suppl_8/mdy289.060/5141217
NCT03446040	2018	308	PORTER	NCT03835533	1	0	1	1	1		0	0	1	0	1; 2; 3		Safety/MTD	Response rate PFS/OS	0		0	1: NKTR-214 (CD122-agonist) 2: Nivolumab 3: Stereotactic body radiation therapy (SBRT) 4: CDX-301 (FLT3-ligand) 5: poly-ICLC (TLR3-ligand)	1+2 2+3+4+5	mCRPC	1	NCT	https://clinicaltrials.gov/ct2/show/NCT03835533
NCT03444753	2018	117	PROPEL	NCT03138889	1	0	1	1	0		1	1	3	1	1; 2; 3		Safety/MTD	Response rate PFS/OS	0	PD-L1 **only NSCLC cohort	0	1: NKTR-214 (CD122-agonist) 2: pembrolizumab 3: atezolizumab	1+2 1+3	melanoma, NSCLC, urothelial ca	1	Vaena DA, J Clin Oncol 2018 (TPS3115)	https://ascopubs.org/doi/abs/10.1200/JCO.2018.36.15_suppl.TPS3115
NCT03435640	2018	393	QUILT-3.055	NCT03228667	1/2	0	0	0	0		0	0	1	1	1; 2; 3		Response rate	Safety/MTD PFS/OS	0	0	2	1: ALT-803 (ALT-15 agonist) 2: Pembrolizumab 3: Nivolumab 4: Atezolizumab 5: Avelumab	1+2 1+3 1+4 1+5	NSCLC, SCLC, Urothelial Carcinoma, H&N, Merkel Cell Carcinoma, Melanoma , RCC, Gastric, Cervical, HCC, Microsatellite Instability/ Mismatch Repair Deficiency mCRC	1	Wrangle JM, Lancet oncol 2018	https://www.ncbi.nlm.nih.gov/pmc/articles/PMC6089612/
NCT03431948	2018	60	REVEAL	NCT03435640	1/2	0	0	0	0		0	0	1	1	1; 2		Response rate PFS/OS	NA	0	0	1	1: NKTR-262 (TLR7/8-agonist) 2: NKTR-214 (CD122-agonist) 3: nivolumab	1+2 1+2+3	Melanoma, Merkel Cell Carcinoma, TNBC, Ovarian Cancer, RCC, CRC, Urothelial Carcinoma, Sarcoma	1	Diab A, Ann of Oncol 2018 (mdy279)	Annals of Oncology (2018) 29 (suppl_8): viii133-viii148. 10.1093/annonc/mdy279
NCT03395899	2017	160	TRIUMPH	NCT03292250	2	1	1	1	0		1	1	2	0	1; 2; 3		Response rate	Safety/MTD PFS/OS	0	PD-L1, CD8 TIL, p16, PI3K, EGFR/HER2, FGFR, CDK4/6	0	1: alpelisib 2: Poziotinib 3: Nintedanib 4: Abemaciclib 5: Durvalumab 6: Tremelimumab	1 2 3 4 5+6	SCCHN	1; 3	Keam B, J Clin Oncol 2018 (e18015)	https://ascopubs.org/doi/abs/10.1200/JCO.2018.36.15_suppl.e18015
NCT03388632	2018	50	//	NCT03742349	1	0	1	1	NA		0	0	1	1	1; 2; 3		Safety/MTD	Response rate PFS/OS	0	NA	0	1: spartalizumab 2: LAG525 3: NIR178 (A2A-inhib) 4: capmatinib 5: MCS110 6: canakinumab (anti-IL1b)	1+2+3 1+2+4 1+2+5 1+2+6	TNBC	1	NCT	https://clinicaltrials.gov/ct2/show/NCT03742349
NCT03386721	2018	280	//	NCT03697304	2	1	0	0	0		0	0	1	1	1; 2		Response rate	PFS/OS	0	NA	1	1: BI 754091 2: BI 754111	1+2	adult solid tumors	1	NCT	https://clinicaltrials.gov/ct2/show/NCT03697304
NCT03373188	2017	32	//	NCT03884556	1	0	0	0	0		0	0	1	0	1; 3		Response rate	Safety/MTD	0	NA	0	1: TTX-030 (anti-CD39) 2: Pembrolizumab 3: Docetaxel 4: Gemcitabine 5: nab paclitaxel	1 1+2 1+3 1+4+5	adult solid tumors and lymphoma	1	NCT	https://clinicaltrials.gov/ct2/show/NCT03884556
NCT03361228	2018	5	//	NCT03267589	2	0	1	1	NA		1	0	1	1	1; 2		Response rate	PFS/OS	0	CD73	0 **if one of the investigational agents	1: Durvalumab 2: Tremelilumab 3: MEDI 9447 (anti-CD73) 4: MEDI 0562 (anti-OX40)	1+3 1+4 2+4	ovarian cancer	1 (relapsed)	NCT	https://clinicaltrials.gov/ct2/show/NCT03267589
NCT03337698	2017	410	//	NCT03386721	2	0	0	0	NA		0	0	1	0	1; 2; 3; 4	Changes in genomic and immune biomarkers	Response rate	Safety/MTD PFS/OS Changes in genomic and immune biomarkers	0	NA	0	1: RO6874281 (IL2v-FAP) 2: Atezolizumab 3: Gemcitabine 4: Vinorelbine	1 1+2 3+4	adult solid tumors		NCT	https://clinicaltrials.gov/ct2/show/NCT03386721
NCT03335540	2018	50	//	NCT02174172	1	0	0	0	NA		0	0	1	0	1; 2; 3		Safety/MTD	Response rate PFS/OS	0	NA	2 (one cohort)	1: Atezolizumab 2: Bevacizumab 3: Interferon alfa-2b 4: Ipilimumab 5: Obinutuzumab (anti-CD20) 6: PEG-interferon alfa-2a	1+4 1+3 1+6 1+2+6 1+5	NSCLC, RCC, melanoma, HNSCC	1	NCT	https://clinicaltrials.gov/ct2/show/NCT02174172
NCT03334617	2017	260	//	NCT02488759	1/2	0	0	0	1		0	0	1	1	1; 2; 3		Response rate Safety/MTD	PFS/OS	0	NA	0	1: Nivolumab 2: Ipilimumab 3: Relatlimab (anti-LAG3) 4: Daratumumab (anti-CD38)	1 1+2 1+3 1+4	virus-related tumors: anal cancer, cervical and vaginal and vulvar SCC, penis cancer, Merkel cell tumor, Nasopharyngeal carcinoma, gastric and GEJ, HNSCC **both virus positive and negative pts are enrolled	1	Hollebecque A, J Clin Oncol 2017 (5504)	https://ascopubs.org/doi/abs/10.1200/JCO.2017.35.15_suppl.5504
NCT03307785	2017	168	//	NCT02628574	1	0	1	3	NA		NA	NA	1	0	3; 1; 4	PK	Safety/MTD	Response rate PK	1	Treg	1	1: TRX518 (anti-GITR) 2: gemcitabine 3: nivolumab 4: pembrolizumab	1 1+2 1+3 1+4	adult solid tumors	1	Velcheti V, Ann Oncol 2018 (mdy487)	Annals of Oncology (2018) 29 (suppl_10): x24-x38. 10.1093/annonc/mdy487
NCT03301636	2017	21	//	NCT02954991	2	0	1	3	2	Sample size based on Predictive Probability Design Enrollment into the Phase 2 is stratified by prior outcome of CIT	0	NA	1	0	1; 3; 4	PK	Response rate	Safety/MTD PK	0	cPD-L1 levels, immune cell populations and cytokines tumor cell PD-L1 expression, tumor infiltrating immune cell populations and gene expression signatures tumor gene alterations in circulation and tumor tissue	2	1: Glesatinib (anti-MET) 2: Sitravatinib (multitarget TKI inhib) 3: Mocetinostat (HDAC.inhib) 4: Nivolumab	1+4 2+4 3+4	NSCLC	1	Leal WLCL 2017 (AB4795)	https://www.mirati.com/wp-content/uploads/2017/10/AB4795_WCLC_2017_MRTX-500_SitravatinibCombo.pdf
NCT03293784	2017	30	//	NCT01714739	1/2	0	1	3	NA		0	0	1	1	3; 1; 2; 4	PK, immunogenicity	Response rate Safety/MTD	PFS/OS PK Immunogenicity	0	assessment of innate and adaptive immunity modulation by this combination in peripheral blood and/or tumor specimens	0	1: Lirilumab (anti-KIR) 2: Nivolumab 3: Ipilimumab	1+2 1+2+3	advanced solid tumors	1	Sanborn RE, J Clin Oncol 2017 (TPS3110)	https://ascopubs.org/doi/abs/10.1200/jco.2013.31.15_suppl.tps3110
NCT03292250	2017	259	//	NCT03459222	1/2	0	1	NA	NA		NA	NA	0	1	1; 3; 2		Response rate Safety/MTD	PFS/OS	0	inclusion criteria: "available tissue for biomarker analysis"	NA	1: Relatlimab (anti-LAG3) 2: Nivolumab 3: BMS-986205 (IDO1 inhib) 4: Ipilimumab	1+2+3 1+2+4	solid tumors	1	NCT	https://clinicaltrials.gov/ct2/show/NCT03459222
NCT03267589	2018	75	//	NCT02723006	1	0	1	1	NA		1	0	3 (NRAS, BRAF)	0	3; 1; 2		Safety/MTD	Response rate PFS/OS	0	NRAS, BRAF	1	1: TAK-580 (panRAF kinase-inhib) 2: TAK-202 (CCR antagonist) 3: vedolizumab (integrin inhib) 4: nivolumab 5: ipilimumab	1+4 2+4 3+4+5	melanoma	1	NCT	https://clinicaltrials.gov/ct2/show/NCT02723006
NCT03241173	2017	52	//	NCT02467361	1/2	0	1	1	NA		0	NA	0	0	3; 1; 4	PK, biomarkers	Safety/MTD	Response rate PK Changes in biomarker	1	Histopathology and Cancer Stem Cell assays will be performed to provide information of the biomarkers on biopsied patient tumor tissue, and archival samples	NA	1: Napabucasin (STAT3-inhib) 2: Ipilimumab 3: Nivolumab 4: Pembrolizumab	1+2 1+3 1+4	advanced cancers	1	NCT	https://clinicaltrials.gov/ct2/show/NCT02467361
NCT03228667	2018	611	//	NCT03126110	1/2	0	NA	NA	NA		NA	NA	0	1	3; 1; 2		Response rate Safety/MTD	PFS/OS	0	NA	NA	1: INCAGN01876 (anti-GITR) 2: Nivolumab 3: Ipilimumab	1+2 1+3 1+2+3	advanced cancers	1	NCT	https://clinicaltrials.gov/ct2/show/NCT03126110
NCT03217747	2017	184	//	NCT03841110	1	0	NA	NA	NA		NA	NA	0	1	3; 1; 4	PK	Safety/MTD	Response rate PK	1	NA	NA	1: FT500 (NK cell cancer IT) 2: Nivolumab 3: Atezolizumab 4: Pembrolizumab	1 1+2 1+3 1+4	advanced cancers	1	NCT	https://clinicaltrials.gov/ct2/show/NCT03841110
NCT03203876	2017	21	//	NCT03502330	1	0	1	3	NA		0	NA	0	1	3; 2; 1; 4	PK; PD on tissue and blood	Safety/MTD	Response rate PFS/OS PK PD on tissue and blood	0	CD8+ T cells; CD163+ macrophages; CD40L levels; IL-10 levels; interferon-gamma levels	2	1: APX005M (CD40 agonist) 2: Cabiralizumab (anti-CSF1R) 3: Nivolumab	1+2 1+2+3	Melanoma, NSCLC, RCC	1	NCT	https://clinicaltrials.gov/ct2/show/NCT03502330
NCT03138889	2017	75	//	NCT03707457	1	0	1	3	NA		0	NA	0	1	3		Safety/MTD	NA	0	"Tumor tissue collected during surgery will be tested for certain biomarkers to determine which immunotherapy might best target the tumor" "To characterize the immune response during and after treatment as measured by immunohistochemistry, and other T cells etc. in peripheral blood To characterize the pharmacodynamic and genomic activity in tumor tissue as target inhibition"	1	1: Nivolumab 2: MK-4166 (anti-GITR) 3: INCB024360 (IDO1 inhib) 4: Ipilimumab	1+2 1+3 1+4	glioblastoma	1	NCT	https://clinicaltrials.gov/ct2/show/NCT03707457
NCT03126110	2017	285	//	NCT02519322	2	1	1	3	0		0	1	1 (change in T infiltrate) 2 (PDL1)	1	1; 2; 3; 4	Immunological response and molecular biomarkers	Response rate	Safety/MTD PFS/OS Immunological response and molecular biomarkers	0	change in T cell infiltrate, PD-L1	0	1: Nivolumab 2: Ipilimumab 3: Relatlimab (anti-LAG3)	1 1+2 1+3	melanoma (IIIB-IV)	3	Amaria RN, J Clin Oncol 2018 (9510)	https://ascopubs.org/doi/abs/10.1200/JCO.2018.36.15_suppl.9510
NCT03026166	2017	42	//	NCT02073123	1/2	0	1	3	NA		0	NA	2	1	3; 1; 2; 4	Mechanisms of activity/resistance to IDO/CTLA-4 inhibitor therapy	Response rate Safety/MTD	PFS/OS Immunological response and molecular biomarkers	0	IDO1, Ki67, PDL1	0	1: Indoximod (IDO1 inhib) 2: Nivolumab 3: Pembrolizumab 4: Ipilimumab	1+2 1+3 1+4	melanoma	1	Zakharia Y, J Clin Oncol 2018 (9512)	https://ascopubs.org/doi/abs/10.1200/JCO.2018.36.15_suppl.9512
NCT03013218	2017	142	//	NCT01986426	1	0	1	3	NA		0	NA	1	0	3; 1; 2; 4	PK	Safety/MTD	Response rate PFS/OS PK	1	T lymphocyte subsets in peripheral blood and injected tumors. T Lymphocytes and PD-L1 expression in bystander (non-injected) tumor biopsies	0 (BC), 2 (melanoma)	1: LTX-315 2: ipilimumab 3: pembrolizumab	1 1+2 1+3	advanced cancers TNBC Melanoma	1	Baurain JF, Cancer Res 2017 (CT108)	http://cancerres.aacrjournals.org/content/77/13_Supplement/CT108
NCT02996110	2017	200	//	NCT02646748	1	0	NA	NA	2	Simon 2-Stage	NA	NA	0	0	3; 1; 2		Safety/MTD	Response rate PFS/OS	1	NA	0	1: pembrolizumab 2: itacitinib (JAK1 inhib) 3: INCB050465 (PI3K inhib)	1+2 1+3	CRC BC RCC PC UC HNSCC NSCLC Endometrial Cancer Melanoma MMR-deficient Tumors	1	NCT	https://clinicaltrials.gov/ct2/show/NCT02646748
NCT02983045	2016	480	//	NCT03447314	1	0	NA	NA	2	Neuenschwander-Continual Reassessment Method (N-CRM design)	NA	NA	0	1	3; 1; 2; 4	PK, immunogenicity	Safety/MTD	Response rate PFS/OS PK, immunogenicity	0	NA	0 (part 2a and 2b) 2 (part 2c)	1: GSK1795091 (TLR4 agonist) 2: GSK3174998 (OX40 agonist) 3: GSK3359609 (anti-ICOS) 4: pembrolizumab	1+2 1+3 1+4	advanced cancers	1	NCT	https://clinicaltrials.gov/ct2/show/NCT03447314
NCT02959437	2017	70	//	NCT03511222	1	0	1	NA	0		0	NA	1	0	3; 1; 2		Safety/MTD	Response rate PFS/OS	1	angiogenic factors and tumor infiltrating lymphocytes	0	1: Vorolanib (VEGFR inhib) 2: Nivolumab 3: Pembrolizumab	1+2 1+3	advanced cancers	1	Bagegni NA, J Clin Oncol 2019 (TPS472)	https://ascopubs.org/doi/abs/10.1200/JCO.2019.37.4_suppl.TPS472
NCT02937818	2016	91	//	NCT03846310	1	0	1	3	NA		0	NA	0	0	3; 1; 4	PK, biomarkers	Safety/MTD	Response rate PK Changes in biomarkers	0	AB928 and AB122 Receptor Occupancy, AB928 and AB122 Immunophenotyping, AB928 and AB122 Gene Expression, AB928 and AB122 Cytokines	1	1: AB928 (anti-A2aR,A2bR) 2: AB122 (anti-PD1) 3: Carboplatin 4: Pemetrexed 5: Pembrolizumab	1+3+4 1+3+4+5 2	NSCLC	1	NCT	https://clinicaltrials.gov/ct2/show/NCT03846310
NCT02935634	2016	300	//	NCT03217747	1/2	0	1	3	NA		0	NA	1	0	3; 4; 1; 2	CD8 immune biomarkers in tumor and blood	Safety/MTD CD8 immune biomarkers in tumor and blood	Response rate PFS/OS	1	CD8 expression	0	1: Avelumab 2: Utomilumab (anti-4-1BB) 3: PF-04518600 (OX40 agonist) 4: Radiation 5: Cisplatin	1+2 1+3 1+2+3 1+2+4 1+3+4 1+2+3+4 1+4+5	advanced cancers	1	NCT	https://clinicaltrials.gov/ct2/show/NCT03217747
NCT02904226	2016	498	//	NCT02205333	1/2	0	1	NA	NA		0	NA	1	1	3; 1; 2; 4	PK, immunogenicity	Safety/MTD	Response rate PFS/OS PK, immunogenicity	0	"candidate biomarkers"	0	1: MEDI6469 (OX40) 2: Tremelimumab 3: Durvalumab 4: Rituximab	1 1+2 1+3 1+4	advanced solid cancers and B-cell lymphomas	1	Powderly JD, J Clin Oncol 2017 (TPS3091)	https://ascopubs.org/doi/abs/10.1200/jco.2015.33.15_suppl.tps3091
NCT02900664	2016	432	SCORES	NCT02499328	1/2	0	1	3	1	Between 68 and 266 eligible patients will be enrolled; A new arm was added for first-line (1L) PD-L1 naive pts	0	NA	1	0	1; 3; 2; 4	PK, PD, immunogenecity and translational biomarkers	Response rate Safety/MTD	PFS/OS PK PD Immunogenecity and translational biomarkers	0	"translational biomarkers" (gene expression immune signatures….) PDL1	0/2 in different arms	1: AZD9150 (STAT3-inhib) 2: durvalumab 3: AZD5069 (CXCR2) 4: tremelimumab	1 3 1+2 2+3 1+2+4 2+3+4	HNSCC	1	Cohen EEW, Ann Oncol 2018 (mdy287)	Annals of Oncology (2018) 29 (suppl_8): viii372-viii399. 10.1093/annonc/mdy287
NCT02890069	2016	400	BALTIC	NCT02937818	2	0	1	3	1	additional arms may open	0	NA	1	0	1; 2	PK	Response rate	PFS/OS	0	"gene expression levels and biomarkers"	0	1: Durvalumab 2: Tremelimumab 3: AZD1775 (WEE1-inhib) 4: carboplatin 5: AZD6738 (ATR-inhib) 6: olaparib	1+2 3+4 5+6	Platinum Refractory Extensive-Stage SCLC	1	Von Powel J, J Clin Oncol 2017 (TPS8585)	https://ascopubs.org/doi/abs/10.1200/JCO.2017.35.15_suppl.TPS8585
NCT02872259	2017	92	//	NCT02900664	1	0	1	3	NA		0	NA	1	0	3; 1; 2; 4	Histopathology of tumor infiltrating lymphocytes (TILs) and myeloid cell infiltrated by IHC; PK, immunogenicity	Safety/MTD	Response rate PK Changes in immune biomarkers	1	Histopathology of tumor infiltrating lymphocytes (TILs) Histopathology of myeloid cell infiltrate by IHC	1	1: spartalizumab 2: canakinumab (anti-IL1b) 3: CJM112 (anti-IL17a) 4: trametinib 5: nazartib (EGFR inhib)	1+2 1+3 1+4 1+5 2	CRC, TNBC, NSCLC	1	NCT	https://clinicaltrials.gov/ct2/show/NCT02900664
NCT02861573	2016	400	//	NCT03026166	1/2	0	1	3	0		0	NA	1	0	3; 1; 2		Safety/MTD	Response rate PFS/OS	0	DLL3 tumor expression Blood inflammatory markers and tumor markers Soluble biomarkers Serosal fluid (when available): PK and exploratory studies	0	1: nivolumab 2: ipilimumab 3: rovalpituzimab	1+3 1+2+3	SCLC	1	Malhotra J, JCO 2019	https://ascopubs.org/doi/abs/10.1200/JCO.2019.37.15_suppl.8516?af=R
NCT02840994	2016	24	//	NCT03454451	1	1	1	3	1	dose expansion cohorts depending on dose escalation results	0	NA	1	1	3; 1; 4	PK	Safety/MTD	PFS/OS PK	0	"potential biomarker signals predictive of response" peripheral blood CD73pos B cells, CD73neg CD4 T cells, CD8 T cells	1	1: CPI-006 (anti-CD73) 2: CPI-444 (anti-A2AR) 3: pembrolizumab	1 1+2 1+3	advanced cancers	1	Mobasher M, J Clin Oncol 2019 (TPS2646)	https://ascopubs.org/doi/abs/10.1200/JCO.2019.37.15_suppl.TPS2646
NCT02819596	2017	195	//	NCT03549000	1	0	1	3	NA		0	NA	1	1	3; 1; 2; 4	PK, immunogenicity, changes in the immune infiltrate in tumors	Safety/MTD	Response rate PFS/OS PK Immunogenicity Changes in immune biomarkers	0	tumor infiltrating lymphocytes (TILs), tumor associated macrophages (TAMs), CD8+ T-cells, PDL-1 expression	1	1: NZV930 (anti-CD73) 2: spartalizumab 3: NIR178 (A2AR-inhib)	1 1+2 1+3 1+2+3	NSCLC TNBC PDAC MSS-CRC Ovarian Cancer RCC	1	NCT	https://clinicaltrials.gov/ct2/show/NCT03549000
NCT02817633	2016	819	//	NCT03381274	1/2	0	1	1	NA		1	NA	3	0	3; 1; 2; 4	PK, immunogenicity	Response rate Safety/MTD	PFS/OS PK Immunogenicity	0	EGFR	0	1: MEDI9447 (anti-CD73) 2: Osimertinib 3: AZD4635 (A2AR-inhib)	1+2 1+3	NSCLC	1	NCT	https://clinicaltrials.gov/ct2/show/NCT03381274
NCT02813135	2016	397	AMBER	NCT02817633	1	0	NA	NA	NA		NA	NA	0	1	3; 1; 2; 4	PK, immunogenicity	Response rate Safety/MTD	PFS/OS PK Immunogenicity	1	NA	0/1 (depending on part)	1: TSR-022 (anti-TIM3) 2: TSR-042 (anti-PD1) 3: TSR-033 (anti-LAG3)	1 1+2 1+2+3	advanced cancers	1	NCT	https://clinicaltrials.gov/ct2/show/NCT02817633
NCT02750514	2016	504	//	NCT03311412	1	0	NA	NA	NA		NA	NA	0	1	3; 1; 2; 4	PK, immunogenicity	Safety/MTD	Response rate PFS/OS PK Immunogenicity	1	NA	0 (part 2), 1 (part 1)	1: Sym021 (anti-PD1) 2: Sym022 (anti-LAG3) 3: Sym023 (anti-TIM3)	1 1+2 1+3	advanced cancers	1	NCT	https://clinicaltrials.gov/ct2/show/NCT03311412
NCT02740985	2016	276	IO-lite	NCT03307785	1	0	NA	NA	0		NA	NA	0	0	3; 1; 2; 4	PK, immunogenicity	Response rate Safety/MTD	PFS/OS PK Immunogenicity	0	NA	0	1: Niraparib 2: TSR-042 (anti-PD1) 3: Carboplatin 4: Paclitaxel 5: Bevacizumab 6: TSR-022 (anti-TIM3) 7: Pemetrexed 8: Nab-Paclitaxel	1+2 2+3+4 1+2+5 2+3+4+5 3+7+2 3+7+2+6 3+8+2 3+8+2+6 3+4+2+6	advanced cancers	1	Gabrail NY, J Clin Oncol 2019 (2560)	https://ascopubs.org/doi/abs/10.1200/JCO.2019.37.15_suppl.2560
NCT02737475	2016	435	//	NCT03662659	2	1	1	NA	0		1 (HER2 neg)	1 (PDL1, LAG3)	0	0	1; 2; 3		Response rate	Safety/MTD PFS/OS	0	PDL1, LAG3, HER2	0	1: Relatlimab (anti-LAG3) 2: Nivolumab 3: XELOX 4: FOLFOX 5: SOX	1+2+(3/4/5) 1+(3/4/5)	gastric cancer	1	Feeney K, J Clin Oncol 2019 (TPS4143)	https://ascopubs.org/doi/abs/10.1200/JCO.2019.37.15_suppl.TPS4143
NCT02723006	2016	22	//	NCT03203876	1	0	NA	NA	NA		NA	NA	0	1	3; 1; 4	PK, immunogenicity	Safety/MTD	Response rate PK Immunogenicity	0	NA	1	1: Lirilumab (anti KIR) 2: Nivolumab 3: Ipilimumab	1+2 1+2+3	advanced cancers	1	NCT	https://clinicaltrials.gov/ct2/show/NCT03203876
NCT02720068	2016	488	//	NCT02559492	1	0	NA	NA	1	additional expansion cohorts	NA	NA	0	1	3; 1		Safety/MTD	Response rate	0	NA	0/2 in different arms	1: Itacitinib (JAK1 inhib) 2: Epacadostat (IDO1 inhib) 3: INCB050465 (PI3K-delta inhib)	1+2 1+3	advanced cancers	1	NCT	https://clinicaltrials.gov/ct2/show/NCT02559492
NCT02718911	2016	178	ECHO-206	NCT02959437	1/2	0	1	3	NA		0	NA	1	0	1; 3		Response rate Safety/MTD	NA	0	TILs, CD8+/Treg ratio	1/2 in different cohorts	1: Azacitidine 2: Pembrolizumab 3: Epacadostat (IDO1 inhib) 4: INCB057643 (BET inhib) 5: INCB059872 (LSD1 inhib)	1+2+3 2+3+4 2+3+5	advanced cancers	1	NCT	https://clinicaltrials.gov/ct2/show/NCT02959437
NCT02705482	2016	58	//	NCT02665416	1	0	1	3	NA		0	NA	1	0	1; 3; 2; 4	PK, immunogenicity, biomarkers	Response rate Safety/MTD	PFS/OS PK Immunogenicity Changes in biomarkers	1	Change in Blood and Tumor Tissue Immune Cell Subpopulations; Change in Peripheral Blood Level of Cytokines; Change in Blood Soluble Proteins	0/2 in different arms	1: Selicrelumab (CD40 agonist) 2: Vanucizumab (Anti-Ang2/Anti-VEGFA) 3: Bevacizumab	1+2 1+3	advanced cancers	1	NCT	https://clinicaltrials.gov/ct2/show/NCT02665416
NCT02658981	2016	100	//	NCT03214250	1/2	1	NA	NA	NA		NA	NA	0	0	3; 2; 1		Safety/MTD PFS/OS	Response rate	0	NA	0	1: APX005M (CD40 agonist) 2: Nivolumab 3: Nab-Paclitaxel 4: Gemcitabine	1+3+4 2+3+4 1+2+3+4	pancreatic cancer	1	NCT	https://clinicaltrials.gov/ct2/show/NCT03214250
NCT02658890	2016	907	//	NCT03013218	1	0	NA	NA	0		0	NA	0	1	3; 1; 4	PK	Safety/MTD	Response rate PK	0	NA	1	1: ALX148 (CD47 inhib) 2: Pembrolizumab 3: Trastuzumab 4: Rituximab	1 1+2 1+3 1+4	advanced cancers	1	Lakhani NJ, J Clin Oncol 2018 (3068)	https://ascopubs.org/doi/abs/10.1200/JCO.2018.36.15_suppl.3068
NCT02644967	2015	53	//	NCT03739931	1	0	1	3	NA		0	NA	1	1	3; 1; 4	Protein expression of IL-23, IL-36γ and OX40L in tumors	Safety/MTD	Response rate PK Changes in immune biomarkers	0	Protein expression of IL-23, IL-36γ and OX40L in tumors	1	1: mRNA-2752 (intralesionale) 2: durvalumab 3: tremelimumab	1 1+2 1+3	advanced cancers	1	NCT	https://clinicaltrials.gov/ct2/show/NCT03739931
NCT02628574	2016	146	//	NCT03241173	1/2	0	NA	NA	NA		NA	NA	0	1	3; 1; 2		Response rate Safety/MTD	PFS/OS	0	NA	1	1: INCAGN01949 (OX40L agonist) 2: Nivolumab 3: Ipilimumab	1+2 1+3 1+2+3	advanced cancers	1	NCT	https://clinicaltrials.gov/ct2/show/NCT03241173
NCT02586987	2015	58	//	NCT02658981	1	0	0	0	0		NA	0	0	1	3; 1; 2		Response rate Safety/MTD	PFS/OS	1	NA	1	1: BMS-986016 (anti-LAG3) 2: urelumab (anti-CD137) 3: nivolumab	1 2 1+3 2+3	glioblastoma gliosarcoma		Lim M, J Clin Oncol 2019 (2017)	https://ascopubs.org/doi/abs/10.1200/JCO.2019.37.15_suppl.2017
NCT02583477	2016	23	//	NCT02705482	1	0	1	NA	NA		0	0	0	1	3; 1; 2; 4	PK, immunogenicity, biomarkers	Safety/MTD	Response rate PFS/OS PK Immunogenicity Changes in immune biomarkers	0	"Subjects must consent to provide archived tumor specimens for correlative biomarker studies"	1	1: MEDI0562 (anti-OX40) 2: Tremelimumab 3: Durvalumab	1+2 1+3	advanced cancers	1	Curti BD, J Clin Oncol 2017 (TPS3100)	https://ascopubs.org/doi/abs/10.1200/JCO.2017.35.15_suppl.TPS3100
NCT02559492	2015	142	C4-MOSART	NCT03431948	1	0	1	3	0		0	0	1	0	4; 1; 2; 3	Dose of stereotactic body radiation therapy (SBRT) that can safety be given with immunotherapy.	Dose of stereotactic body radiation therapy (SBRT) that can safety be given with immunotherapy.	Response rate Safety/MTD PFS/OS	0	IHC: CD8, PDL1, CSF1R, TAM kinase; gene array: myeloid and interferon inducible genes sequencing of germline DNA on tumor blood gut microbiome sequencing pheripheral blood T cell functional activity	2	1: Nivolumab 2: Cabiralizumab (anti-CSF1R) 3: Urelumab (anti-CD137) 4: Stereotactic Body Radiation Therapy	1+3+4 1+2+4	advanced cancers	1	Foster CC, J Clin Oncol 2018 (TPS3121)	https://ascopubs.org/doi/abs/10.1200/JCO.2018.36.15_suppl.TPS3121
NCT02554812	2015	560	//	NCT03499899	2	1	NA	NA	NA		NA	0	0	0	1; 2; 3; 4	PK, immunogenicity	Response rate	Safety/MTD PFS/OS PK Immunogenicity	0	NA	0	1: LAG525 2: spartalizumab 3: carboplatin	1+2 1+2+3 1+3	TNBC	1	NCT	https://clinicaltrials.gov/ct2/show/NCT03499899
NCT02535078	2015	85	//	NCT02890069	1	0	1	3	NA		0	0	1	0	3; 1; 2; 4	PK, immunogenicity, Quantification of Tumor Infiltrating Lymphocytes (TILs), Characterization of TILs and myeloid cell infiltrate	Safety/MTD	Response rate PFS/OS PK Immunogenicity Changes in immune biomarkers	1	TILs by H&E, Characterization of TILs and myeloid cell infiltrate by IHC	1	1: PDR001 2: LCL161 (SMAC mimetic) 3: Everolimus 4: Panobinostat (HDAC-inhib) 5: QBM076 (CXCR2 antagonist) 6: HDM201(HDM2 inhib)	1+2 1+3 1+4 1+5 1+6	CRC, NSCLC, TNBC, RCC	1	NCT	https://clinicaltrials.gov/ct2/show/NCT02890069
NCT02519322	2016	53	//	NCT02718911	1	0	NA	NA	NA		NA	0	0	1	3; 1; 4	PK, immunogenicity	Safety/MTD	Response rate PFS/OS PK Immunogenicity	0	NA	1	1: LY3022855 (CSF1R-inhib) 2: Durvalumab 3: Tremelimumab	1+2 1+3	advanced cancers	1	NCT	https://clinicaltrials.gov/ct2/show/NCT02718911
NCT02499328	2015	465	SELECT-4	NCT02586987	1	0	1	3	1	Expansion cohorts will open independently for double and triple combination treatments. Additional cohorts may be opened to explore different doses and schedules	0	NA	1	0	3; 1; 2; 4	immunogenicity	Safety/MTD	Response rate PFS/OS Immunogenicity	1	"Biomarkers will be assessed as an exploratory objective"	0	1: Selumetinib (MEK-inhib) 2: Durvalumab 3: Tremelimumab	1+2 1+2+3	advanced cancers	1	Janne PA, J Clin Oncol 2017 (TPS2607)	https://ascopubs.org/doi/abs/10.1200/JCO.2016.34.15_suppl.TPS2607
NCT02488759	2015	600	CALYPSO	NCT02819596	2	1	1	1	NA		1	0	1	0	3; 1; 2; 4	PK	Response rate Safety/MTD	PFS/OS PK	0	C-met, PD-L1	0	1: Savolitinib (cMET-inhib) 2: Durvalumab 3: Tremelimumab	1 2 1+2 2+3	RCC	1	Powles T, J Clin Oncol 2019 (545)	https://ascopubs.org/doi/abs/10.1200/JCO.2019.37.7_suppl.545
NCT02467361	2015	104	//	NCT02535078	1/2	1	1	3	NA		1 (HLA-A0201+)	0	3; 1	1	2; 1		PFS/OS	Response rate	0	HLA-A*0201 positive + exploratories	0/2 depending on part	1: IMCgp100 (gp100-specific T cell receptor with anti-CD3 scFV) 2: durvalumab 3: tremelimumab	1 1+2 1+3 1+2+3	melanoma	1	NCT	https://clinicaltrials.gov/ct2/show/NCT02535078
NCT02406781	2015	227	//	NCT02583477	1/2	0	1	1	NA		NA	0	0	0	1; 3; 2; 4	PK, immunogenicity	Response rate Safety/MTD	PFS/OS PK Immunogenicity	0	PDL1	0	1: Durvalumab 2: nab-paclitaxel 3: gemcitabine 4: AZD5069 (CXCR2 antag)	1+2+3 1+4	pancreatic cancer	1	NCT	https://clinicaltrials.gov/ct2/show/NCT02583477
NCT02302339	2014	132	//	NCT02301130	1	1	1	3	NA		0	0	1	1	3; 1; 4	PK	Safety/MTD	Response rate PK	1	number of peripheral blood CCR4+ effector Tregs (eTregs) other T cells	0	1: Mogamulizumab 2: Durvalumab 3: tremelimumab	1+2 1+3	advanced cancers	1	Zamarin, SITC 2018 (O19)	SITC, 2018
NCT02301130	2014	64	//	NCT03923270	1	0	NA	NA	NA		NA	0	0	0	3; 2		Safety/MTD PFS/OS	NA	0	NA	1	1: Durvalumab 2: Tremelimumab 3: Olaparib 4: RT	1+4 1+2+4 1+3+4	SCLC	1	NCT	https://clinicaltrials.gov/ct2/show/NCT03923270
NCT02205333	2014	48	BEGONIA	NCT03742102	1/2	1	1	3	2	The study is designed to evaluate potential novel triplet combinations using a 2-stage approach	0	0	1	0	3; 1; 2; 4	PK, immunogenicity	Safety/MTD	Response rate PFS/OS PK Immunogenicity	0	TILs, protein expression by IHC, mRNA, ctDNA	0	1: Durvalumab 2: Selumetinib (MEK-inhib) 3: Capivasertib (AKT-inhib) 4: Danvatirsen (STAT3-inhib) 5: Oleclumab (CD73-inhib) 6: Paclitaxel	1+6 1+2+6 1+3+6 1+4+6 1+5+6	TNBC	1	Schmid P, Cancer Res 2019 (OT3-01-01)	http://cancerres.aacrjournals.org/content/79/4_Supplement/OT3-01-01
NCT02174172	2014	158	//	NCT02740985	1	0	NA	NA	NA		NA	0	0	0	3; 1; 4	PK	Safety/MTD	Response rate PK	0	NA	0/2 in different arms	1: AZD4635 (A2AR agonist) 2: Durvalumab 3: Abiraterone 4: Enzalutamide	1 1+2 1+3 1+4	advanced cancers, mCRPC, NSCLC, CRC	1	NCT	https://clinicaltrials.gov/ct2/show/NCT02740985
NCT02089685	2014	293	//	NCT02302339	2	0	1	1	NA		0	0	1	0	3; 1; 2		Response rate Safety/MTD	PFS/OS	0	gpNMB Expression	2	1: glembatumumab vedotin (ADC) 2: varlilumab (anti-CD27) 3: nivolumab OR pembrolizumab 4: CDX-301	1 1+2 1+3 1+4	melanoma	1	Ott PA, J Clin Oncol 2017 (109)	https://ascopubs.org/doi/abs/10.1200/JCO.2017.35.15_suppl.109
NCT02073123	2014	132	//	NCT03301636	2	0	1	1/3	2	"This is an adaptive clinical trial"	0	0	1	1	3		Safety/MTD	NA	0	RNA-seq analysis, multiplex immunofluorescence staining for IDO1, Ki67, PD-L1 expression	0	1: Pembrolizumab 2: Nivolumab 3: Indoximod (anti-IDO)	1+3 2+3	melanoma	1	NCT	https://clinicaltrials.gov/ct2/show/NCT03301636
NCT01986426	2013	80	CheckMate 016	NCT01472081	1	0	NA	NA	NA		NA	NA	0	0	3; 1; 2		Safety/MTD	Response rate PFS/OS	0	NA	0	1: nivolumab 2: ipilimumab 3: pazopanib 4: sunitinib	1+2 1+3 1+4	RCC	1	Amin A, J Immunother Cancer 2018	https://www.ncbi.nlm.nih.gov/pmc/articles/PMC6196426/
NCT01714739	2012	337	TICIMEL	NCT03293784	1	0	NA	NA	NA		NA	NA	0	1	3; 1; 2		Safety/MTD	Response rate PFS/OS	0	NA	1	1: nivolumab 2: ipilimumab 3: infliximab 4: certolizumab	1+2+3 1+2+3+4	melanoma	1	NCT	https://clinicaltrials.gov/ct2/show/NCT03293784
NCT01472081	2012	175	//	NCT02311920	1	1	1	1	0		0	0	1	0	3; 1; 2		Safety/MTD	Response rate PFS/OS	0	TILs "Biomarker analysis of immune cells within tumor samples using standard immunohistochemistry"	0	1: nivolumab 2: ipilimumab 3: temozolomide	1+3 2+3 1+2+3	glioblastoma	2	Sloan AE, J Clin Oncol 2018 (2053)	https://ascopubs.org/doi/abs/10.1200/JCO.2018.36.15_suppl.2053
NCT03739931	2018	130	//	NCT03769155	1	0	1	3	0		0	0	1	1	4; 3; 1; 2	Biomarker parameter analysis	Biomarker parameter analysis	Response rate PFS/OS Safety/MTD	0	target (SEMA4D) saturation • CD3+ CD4+/CD8+ T cells • CD19+ B cells • CD3+/- CD56+ NK-T and NK • CD3+ CD4/8+ HLA-DR+ CD38+ Ki67+ stem-like PD-1 responsive T cell population • PD1/Tim3,CD26 expression • Treg: CD3+ CD4+ CD25+ GITR+ CD127- T cells; • Foxp3 & SEMA4D • SEMA4D, Plexin B1/B2, and PD-L1 expression on all cells	0	1: Ipilimumab 2: Nivolumab 3: VX15/2503 (mAb anti-SEMA4D)	3 1+3 2+3 1+2+3	melanoma	3	Lowe MC, J Clin Oncol 2019 (TPS9603)	https://ascopubs.org/doi/abs/10.1200/JCO.2019.37.15_suppl.TPS9603?af=R
NCT03484923	2018	230	//	NCT03816358	1	0	1	3	NA		0	0	3 (mesothelin)	0	3; 1; 2; 4	Biomarker analysis	Safety/MTD	Response rate PFS/OS Changes in immune biomarkers	0	CD8; mesothelin	0	1: Anetumab Ravtansine (anti-mesotelina) 2: Gemcitabine Hydrochloride 3: Ipilimumab 4: Nivolumab	1+4 1+2+4 1+3+4	pancreas	1	NCT	https://clinicaltrials.gov/ct2/show/NCT03816358
NCT03555149	2018	160	//	NCT03575793	1/2	1	NA	NA	0		NA	0	0	1	3; 2; 1		Safety/MTD PFS/OS	Response rate	0	NA	0	1: Nivolumab 2: Plinabulin 3: Ipilimumab	1+2 1+2+3	SCLC	1	NCT	https://www.clinicaltrials.gov/ct2/show/NCT03575793
NCT03424005	2018	310	//	NCT03373188	1	1	1	3	0		0	0	1	0	4; 3	Evaluate treatment effects of the study drugs on tumor cluster of differentiation 8+ (CD8+) T cell infiltration between the treatment groups	Evaluate treatment effects of the study drugs on tumor cluster of differentiation 8+ (CD8+) T cell infiltration between the treatment groups	Safety/MTD	0	target (SEMA4D) saturation • CD3+ CD4+/CD8+ T cells • CD19+ B cells • CD3+/- CD56+ NK-T and NK • CD3+ CD4/8+ HLA-DR+ CD38+ Ki67+ stem-like PD-1 responsive T cell population • PD1/Tim3,CD26 expression • Treg: CD3+ CD4+ CD25+ GITR+ CD127- T cells; • Foxp3 & SEMA4D • SEMA4D, Plexin B1/B2, and PD-L1 expression on all cells	0	1: VX15/2503 (mAb anti-SEMA4D) 2: Ipilimumab 3: Nivolumab	1 1+2 1+3	pancreas, CRC	3	NCT	https://clinicaltrials.gov/ct2/show/NCT03373188
NCT03280563	2017	111	CheckMate 9UT	NCT03519256	2	1	NA	NA	2	Using a novel adaptive-type design	NA	NA	0	1	1; 2; 3		Response rate	Safety/MTD PFS/OS	0	NA	0	1: Nivolumab 2: BCG 3: BMS-986205 (IDO-inhib)	1 1+2 1+3 1+2+3	UC	????	Hahn NM, J Clin Oncol 2019 (TPS493)	https://ascopubs.org/doi/abs/10.1200/JCO.2019.37.7_suppl.TPS493
NCT03193190	2017	205	//	NCT03388632	1	0	1	3	0		0	0	1	1	3; 1; 4	Biological effects	Safety/MTD	Response rate PFS/OS Changes in immune biomarkers	1	changes in circulating T cell subsets; plasma level of pro-inflammatory cytokines, PD-1/PD-L1 expression and immune cell activation/inhibition (Zap70 pY493 pY580 SHP2) in circulating cell and tumor tissue	1	1: rhIL-15 2: Ipilimumab 3: Nivolumab	1+2 1+3 1+2+3	advanced cancers	1	O' Sullivan GH, J Clin Oncol 2018 (TPS3128)	https://ascopubs.org/doi/abs/10.1200/JCO.2018.36.15_suppl.TPS3128
NCT02665416	2016	170	//	NCT02658890	1/2	1	1	3	NA		0	1	1	1	1; 2; 3; 4	PK, immunogenicity	Response rate PFS/OS Safety/MTD	PK Immunogenicity	0	IDO1, PD1 and PDL1, kynurenine, lymphocytes subset (CD8+ T cells, Treg, Teff…), NK markers, tumor mutational load/neoantigens, tumor antigen-directed T cells (and others…)	0/1 (depending on part)	1: BMS-986205 (IDO-inhib) 2: Nivolumab 3: Ipilimumab	1+2 1+2+3	advanced cancers	1	Luke J, SITC 2017 (O41)	https://jitc.biomedcentral.com/articles/10.1186/s40425-017-0297-3
NCT02311920	2015	32	//	NCT02754141	1/2	0	1	3	NA		0	0	1	1	3; 1; 4	PK, immunogenicity, BMS-986179 enzime assay and IHC in pre- and on-treatment biopsies	Safety/MTD	Response rate PK Immunogenicity Changes in immune biomarkers	0	BMS-986179 enzime assay and IHC in pre- and on-treatment biopsies	NA	1: BMS-986179 (antiCD73) 2: Nivolumab 3: rHuPH20	1 1+2 1+3	advanced cancers	1	Siu LL, Cancer Res 2018 (CT180)	http://cancerres.aacrjournals.org/content/78/13_Supplement/CT180
NCT02754141	2016	221	//	NCT03446040	1/2	0	NA	NA	NA		NA	0	0	1	3; 1; 2; 4	PK, immunogenicity	Safety/MTD	Response rate PFS/OS PK Immunogenicity	0	NA	NA	1: BMS-986258 (antiTIM3) 2: Nivolumab 3: rHuPH20	1 1+2 1+3	advanced cancers	1	NCT	https://clinicaltrials.gov/ct2/show/NCT03446040
NCT02060188	2014	340	//	NCT02840994	1	0	NA	NA	0		NA	0	0	1	2; 1; 3		PFS/OS	Response rate Safety/MTD	0	NA	0/1 (depending on part)	1: CV301 2: nivolumab 3: pembrolizumab	1+2 1+3	NSCLC	1	Rajan A, J Clin Oncol 2018 (TPS9108)	https://ascopubs.org/doi/abs/10.1200/JCO.2018.36.15_suppl.TPS9108
NCT03347123	2018	11	//	NCT03829436	1	0	1	3	0		0	0	1	0	3; 1; 4	PK	Safety/MTD	Response rate PK	0	gene expression profiling of PPARα-associated genes, tumor markers of immune modulation and serum lipid profiling	1	1: TPST-1120 2: nivolumab 3: docetaxel 4: cetuximab	1 1+2 1+3 1+4	advanced cancers	1	Laport G, J Clin Oncol 2019 (TPS2665)	https://ascopubs.org/doi/abs/10.1200/JCO.2019.37.15_suppl.TPS2665
NCT02546661	2016	156	ECHO-208	NCT03347123	1/2	0	NA	NA	NA		NA	0	0	1	3; 1; 2		Response rate Safety/MTD	PFS/OS	0	NA	0	1: Epacadostat 2: Nivolumab 3: Ipilimumab 4: Lirilumab	1+2+3 1+2+4	advanced cancers	1	NCT	https://clinicaltrials.gov/ct2/show/NCT03347123
NCT03311412	2017	102	//	NCT03251924	1/2	0	1	3	NA		NA	0	1	1	3; 1; 2; 4	PK, immunogenicity, Change from baseline in immunoassay for BMS-986226	Safety/MTD	Response rate PFS/OS Changes in immune biomarkers	0	immunoassay for BMS-986226	NA	1: BMS-986226 (anti-ICOS) 2: Nivolumab 3: Ipilimumab	1 1+2 1+3	advanced cancers	1	NCT	https://clinicaltrials.gov/ct2/show/NCT03251924
NCT02954991	2016	209	//	NCT02737475	1/2	1	1	3	NA		NA	0	1	1	3; 1; 2; 4	PK, immunogenicity, Change from baseline in immunoassay for BMS-986178	Safety/MTD	Response rate PFS/OS Changes in immune biomarkers	0	IFN-γ; proliferating (Ki-67+) effector memory T cells; OX40 expression on the cell surface of CD4+ T cells and Tregs; sOX40 levels	1	1: BMS-986178 (OX40-agonist) 2: Nivolumab 3: Ipilimumab	1 1+2 1+3 1+2+3	advanced cancers	1	Wang R, Cancer Res 2018 (LB-127)	http://cancerres.aacrjournals.org/content/78/13_Supplement/LB-127
NCT02646748	2016	159	//	NCT03444753	1/2	0	NA	NA	NA		NA	0	0	1	3; 4	PK	Safety/MTD	PK	0	NA	2	1: BMS-986299 (NLRP3 agonist) 2: Nivolumab 3: Ipilimumab	1 1+2+3	advanced cancers	1	NCT	https://clinicaltrials.gov/ct2/show/NCT03444753
NCT03697304	2019	110	//	NCT03690986	1	1	1	3	NA		NA	0	1	1	4; 3	Change in immune profile in the tumor microenvironment, in circulating percentage of immune suppressor subsets in peripheral blood, Phenotypic shifts in T lymphocyte subsets in peripheral blood	Change in immune profile in the tumor microenvironment, in circulating percentage of immune suppressor subsets in peripheral blood, Phenotypic shifts in T lymphocyte subsets in peripheral blood	Safety/MTD	0	target (SEMA4D) saturation • CD3+ CD4+/CD8+ T cells • CD19+ B cells • CD3+/- CD56+ NK-T and NK • CD3+ CD4/8+ HLA-DR+ CD38+ Ki67+ stem-like PD-1 responsive T cell population • PD1/Tim3,CD26 expression • Treg: CD3+ CD4+ CD25+ GITR+ CD127- T cells; • Foxp3 & SEMA4D • SEMA4D, Plexin B1/B2, and PD-L1 expression on all cells	0	1: VX15/2503 (mAb anti-SEMA4D) 2: nivolumab 3: ipilimumab	1 2 3 1+2 1+3	HNSCC	3	NCT	https://clinicaltrials.gov/ct2/show/NCT03690986
NCT03662659	2018	250	PEMBROSARC	NCT02406781	2	0	1	3	2	2 stage Simon design	1 (PDL1+ and/or IDO+)	0	1; 3	0	1; 2; 3; 4	Biomarkers	Response rate	Safety/MTD PFS/OS Changes in genomic and immune biomarkers	1	PDL1, IDO Exploration of blood cytokines levels (TNFγ, TNFα, TGFβ, IL2, 4, 6, 10) Exploration of blood VEGF, Svegfr2 and TPS-1 levels Exploration of lymphocytes subpopulations monitoring, CD8+/Treg ratio Exploration of Plasma levels of Kynurenine and Kynurenine to Tryptophan ratio	0	1: pembrolizumab 2: metronomic cyclophosphamide 3: G100 (TLR4 agonist) 4: epacadostat 5: Tazemetostat	1+2 1+2+3 1+2+4 1+2+5	sarcoma	1	Taulmonde M, J Clin Oncol 2018 (TPS11587)	https://ascopubs.org/doi/abs/10.1200/JCO.2018.36.15_suppl.TPS11587
NCT03519256	2018	436	ILLUMINATE-204	NCT02644967	1/2	0	1	3	0		0	1 (BRAF)	1; 2	1	1; 3		Response rate Safety/MTD	NA	0	BRAF Immune analyses of T-cell repertoire diversity evaluated by high-throughput CDR3 sequencing IRF7; IFN1 pathway; Ki67 on CD8+ cells	2	1: IMO-2125 2: pembrolizumab 3: ipilimumab	1+2 1+3	melanoma	1	Uemura MI, J Clin Oncol 2018 (136)	https://ascopubs.org/doi/abs/10.1200/JCO.2017.35.7_suppl.136
NCT03281369	2017	357	//	NCT02872259	1/2	1	1	3	0		1	0	1/3	0	3; 1; 2		Response rate Safety/MTD	PFS/OS	0	BRAF, tumor load (stratification factors) "Plasma protein biomarker levels were measured using the DiscoveryMap v3.3 panel (Myriad RBM)"	0	1: BGB324 2: dabrafenib 3: trametinib 4: pembrolizumab	1+4 1+2+3 4 2+3	melanoma	1	Straume O, J Clin Oncol 2018 (9548)	https://ascopubs.org/doi/abs/10.1200/JCO.2018.36.15_suppl.9548
NCT03251924	2017	277	MK-4280-001	NCT02720068	1	0	NA	NA	NA		NA	1	0	0	3; 1; 4	PK	Safety/MTD	Response rate PK	0	NA	0	1: MK-4280 (anti-LAG3) 2: Pembrolizumab 3: Oxaliplatin 4: Irinotecan 5: Calcium Folinate 6: 5-FU 7: MK-4280A (pembro+anti-LAG3)	1 1+2 1+2+3+5+6 1+2+4+5+6 7	advanced cancers	1	NCT	https://clinicaltrials.gov/ct2/show/NCT02720068
NCT03835533	2019	30	//	NCT03361228	1/2	0	NA	NA	NA		NA	0	0	1	3; 1; 2; 4	PK	Response rate Safety/MTD	PFS/OS PK	0	NA	1	1: INCB001158 (arginase inhib) 2: Epacadostat 3: Pembrolizumab	1+2 1+2+3	advanced cancers	1	NCT	https://clinicaltrials.gov/ct2/show/NCT03361228
NCT03516981	2018	288	INDUCE-1	NCT02723955	1	0	1	3	NA		0	0	1	0	3; 1; 2; 4	PK, immunogenicity	Safety/MTD	Response rate PFS/OS PK Immunogenicity	0	provide biomarker data that may inform on optimal dose selection as well as mechanistic understanding of GSK3359609 activity	1	1: GSK3359609 (anti-ICOS) 2: GSK3174998 (OX40 agonist) 3: Pembrolizumab 4: CT	1 1+2 1+3 1+4	advanced cancers	1	Angevin E, J Clin Oncol 2017 (TPS3113)	https://ascopubs.org/doi/abs/10.1200/JCO.2017.35.15_suppl.TPS3113
NCT03214250	2017	129	MK-3475-029/ KEYNOTE-29	NCT02089685	1/2	1	1	1	1		NA	1 (PDL1)	2	1	1; 2; 3		Response rate PFS/OS Safety/MTD	NA	0	PDL1	0	1: pembrolizumab 2: ipilimumab 3: PegIFN-2b	1+2 1+3	melanoma, RCC	1	Atkins MB, J Clin Oncol 2017 (3009)	https://ascopubs.org/doi/abs/10.1200/jco.2015.33.15_suppl.3009
			* quilt uses PD-L1 in some cohorts, this can be considered as a n
			** refers to the ph2 part if ph1/2

## Sheet: Sheet2
NCT
NCT03335540
NCT03699449
NCT02546661
NCT02060188
NCT03822351
NCT03851614
NCT03395899
NCT02813135
NCT02996110
NCT02750514
NCT02935634
NCT03334617
NCT02904226
NCT02554812
NCT02861573
NCT03516981
NCT03819465
NCT03869190
NCT03281369
NCT03193190
NCT03337698
NCT03555149
NCT03280563
NCT03424005
NCT03518606
NCT03784014
NCT03794544
NCT02983045
NCT03484923
NCT03835533
NCT03138889
NCT03228667
NCT03435640
NCT03292250
NCT03742349
NCT03697304
NCT03884556
NCT03267589
NCT03386721
NCT02174172
NCT02488759
NCT02628574
NCT02954991
NCT01714739
NCT03459222
NCT02723006
NCT02467361
NCT03126110
NCT03841110
NCT03502330
NCT03707457
NCT02519322
NCT02073123
NCT01986426
NCT02646748
NCT03447314
NCT03511222
NCT03846310
NCT03217747
NCT02205333
NCT02499328
NCT02937818
NCT02900664
NCT03026166
NCT03454451
NCT03549000
NCT03381274
NCT02817633
NCT03311412
NCT03307785
NCT03662659
NCT03203876
NCT02559492
NCT02959437
NCT02665416
NCT03214250
NCT03013218
NCT03739931
NCT03241173
NCT02658981
NCT02705482
NCT03431948
NCT03499899
NCT02890069
NCT02718911
NCT02586987
NCT02819596
NCT02535078
NCT02583477
NCT02301130
NCT03923270
NCT03742102
NCT02740985
NCT02302339
NCT03301636
NCT01472081
NCT03293784
NCT02311920
NCT03769155
NCT03816358
NCT03575793
NCT03373188
NCT03519256
NCT03388632
NCT02658890
NCT02754141
NCT03446040
NCT02840994
NCT03829436
NCT03347123
NCT03251924
NCT02737475
NCT03444753
NCT03690986
NCT02406781
NCT02644967
NCT02872259
NCT02720068
NCT03361228
NCT02723955
NCT02089685
